# Supplementary material for: Issues on DFT+U calculations of organic diradicals
Source: Royal Society of Chemistry journal article supplement (doi:10.1039/d3cp04187e), 2023-01-01
Supplement: d3cp04187e1.pdf [file d3cp04187e1.pdf]

## Supporting Information

for

### “Issues on DFT+ $U$ calculations of organic diradicals”

Kohei Tada<sup>1</sup>, and Yasutaka Kitagawa<sup>2#</sup>

<sup>1</sup> *Research Institute of Electrochemical Energy, Department of Energy and Environment (RIECEN), National Institute of Advanced Industrial Science and Technology (AIST), 1-8-31 Midorigaoka, Ikeda, Osaka 563-8577, Japan.*

<sup>2</sup> *Department of Materials Engineering Science, Graduate School of Engineering Science, Osaka University, Toyonaka, Osaka 560-8531, Japan*

# Corresponding Author

phone: +81-72-751-8566

k-tada@aist.go.jp

#### ***Table of Contents***

- Spin density distributions estimated by DFT+ $U$ : Figs. S1–S6 p. 2 – 6
- Index for the atoms in the calculated molecules: Fig. S7 p. 7
- Local magnetic moments: Tables S1-S4 p. 8 – 13
- $U$  dependence of local magnetic moments: Figs. S8–S11 p. 14 – 17

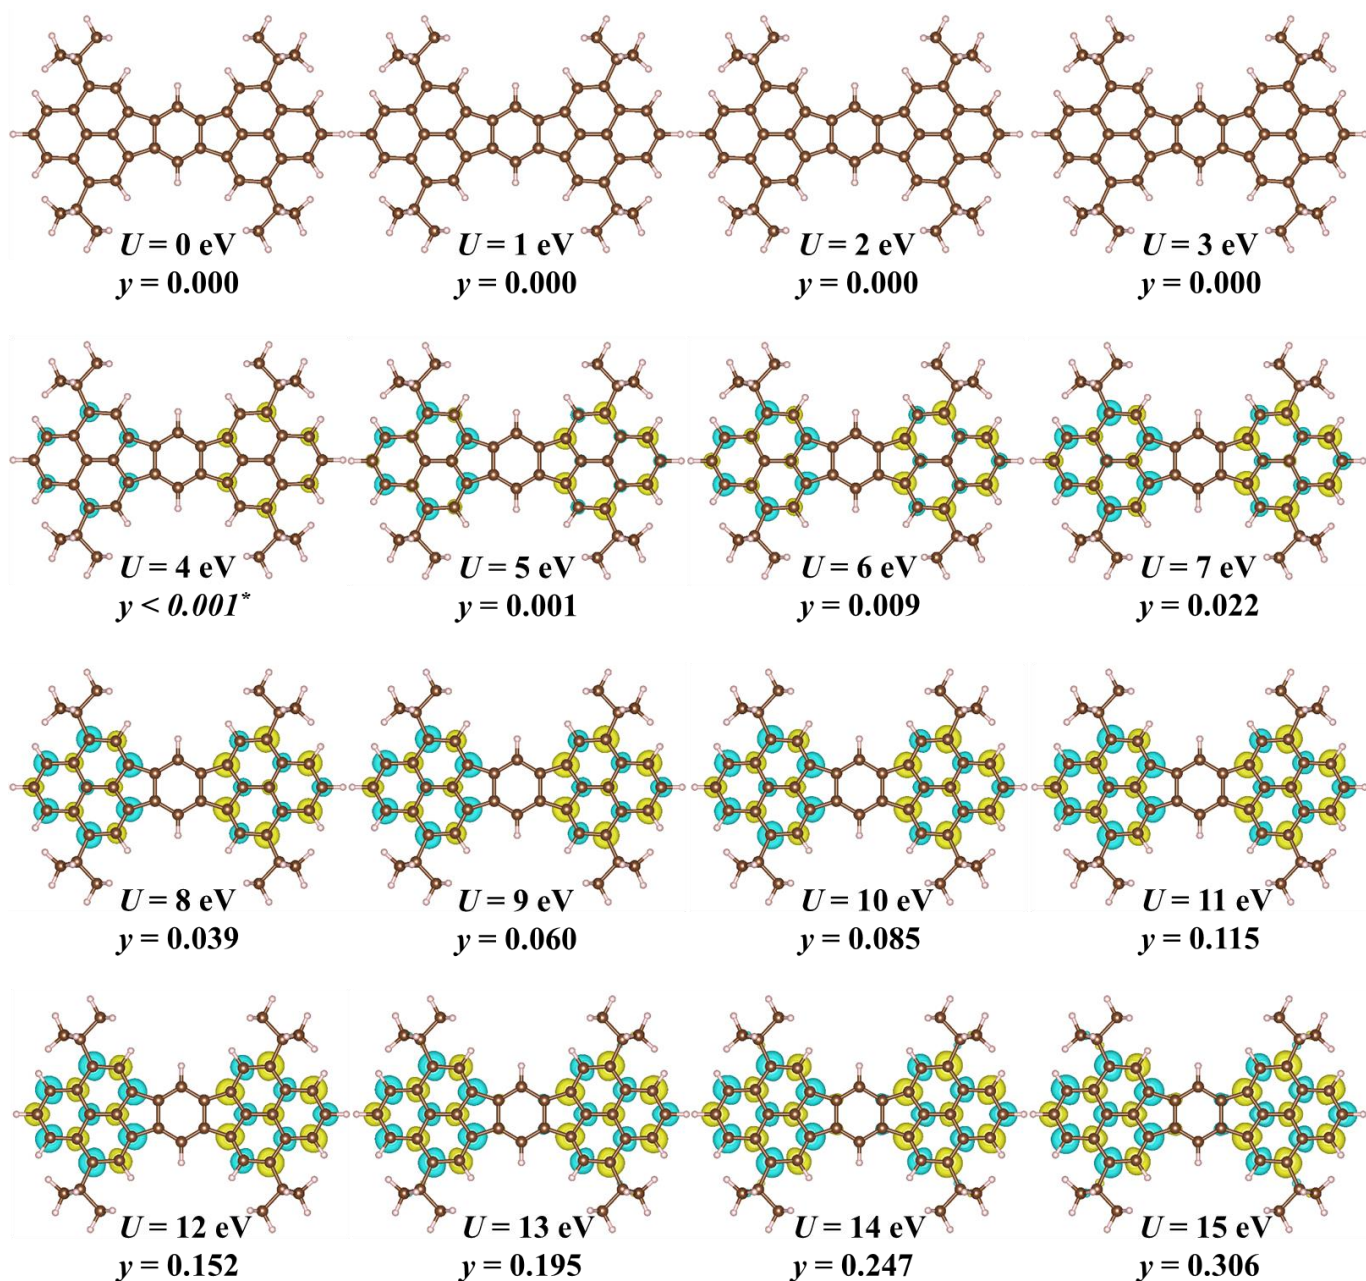

**Figure S1.** Dependence of spin density distributions of singlet state of Mol 1 on  $U$  value of DFT+ $U$  calculation. The threshold is  $0.003 \text{ e}^-/\text{Bohr}^3$ . Yellow and blue represent the spin density of major and minor spins, respectively. \*Although the spin is polarised in the results by  $U = 4 \text{ eV}$ , the  $y$  value could not be estimated because the spin distribution on the carbons is too small (the detail is described in main text).

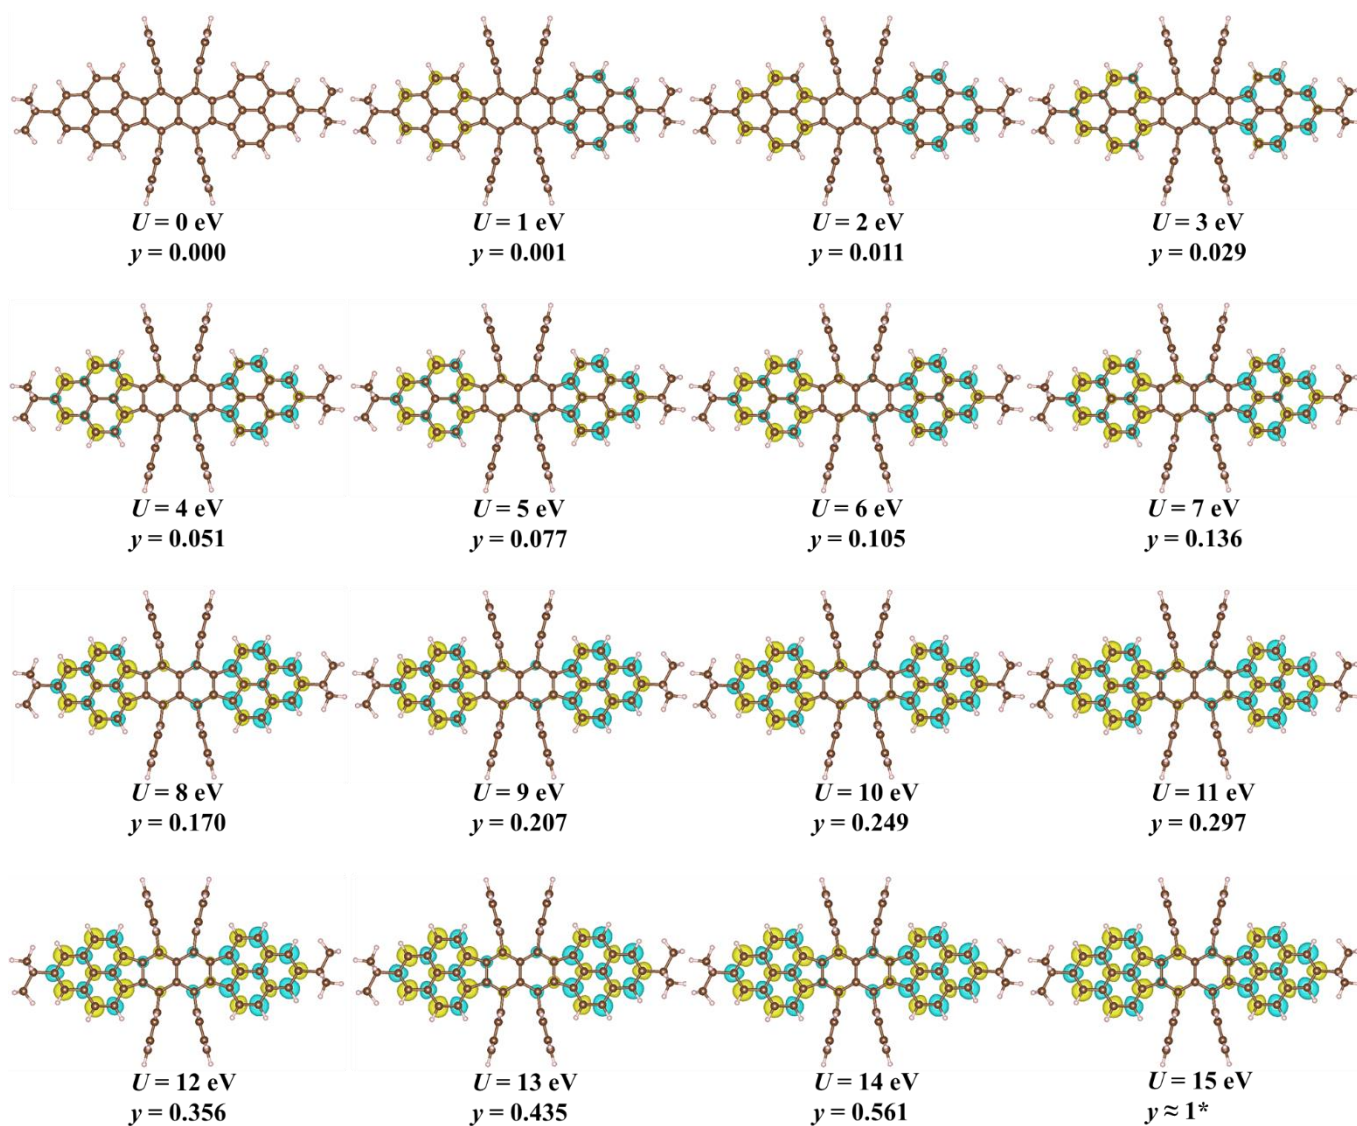

**Figure S2.** Dependence of spin density distributions of singlet state of Mol 2 on  $U$  value of DFT+ $U$  calculation. The threshold is  $0.003 \text{ e}^-/\text{Bohr}^3$ . Yellow and blue represent the spin density of major and minor spins, respectively. \*Spin polarisation in the results by  $U=15 \text{ eV}$  is too large to estimate the  $y$  value using electron density.

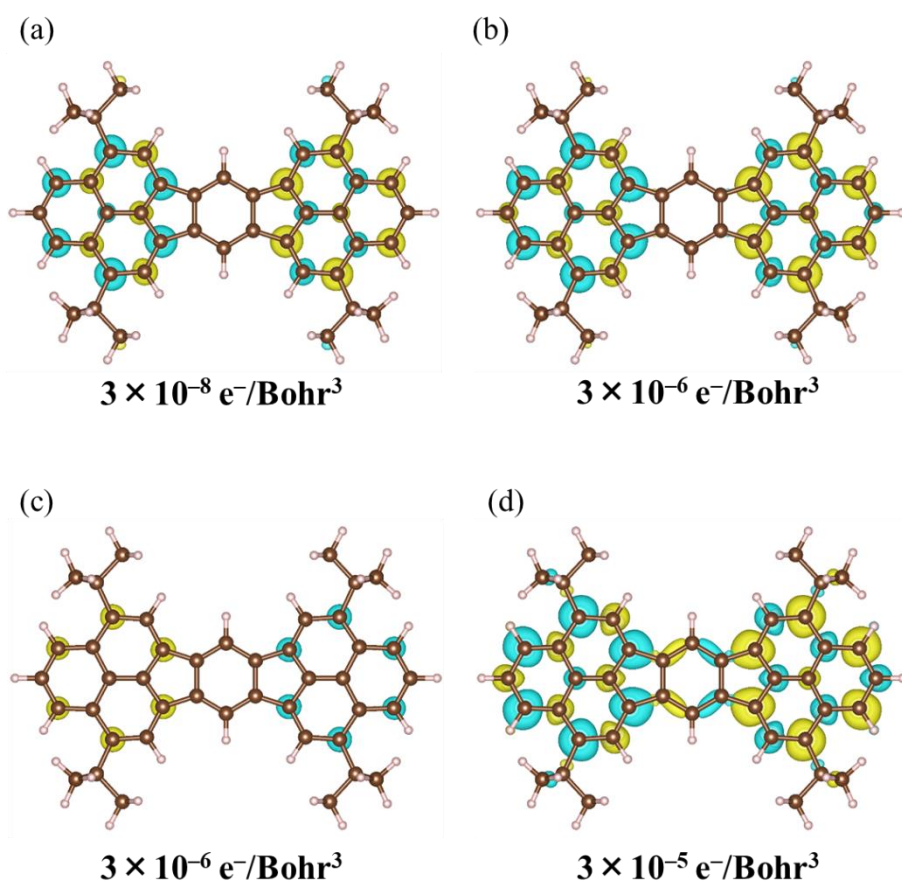

**Figure S3.** Spin density distributions of singlet state of Mol 1 estimated by DFT+ $U$ /plane-wave with low threshold. (a)  $U = 0$  eV (threshold is  $3 \times 10^{-8}$  a.u.), (b)  $U = 1$  eV (threshold is  $3 \times 10^{-6}$  a.u.), (c)  $U = 2$  eV (threshold is  $3 \times 10^{-6}$  a.u.), and (d)  $U = 3$  eV (threshold is  $3 \times 10^{-5}$  a.u.). Yellow and blue represent the spin density of major and minor spins, respectively.

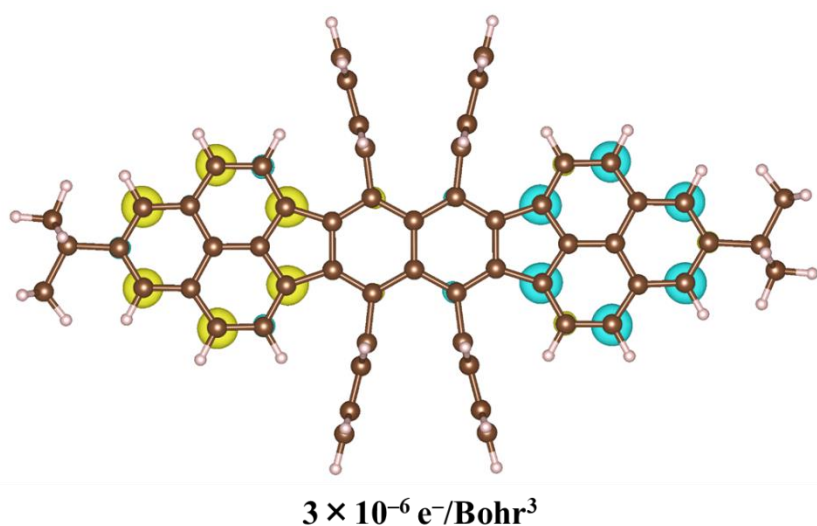

**Figure S4.** Spin density distributions of singlet state of Mol 2 estimated by pure-DFT/plane-wave with low threshold ( $3 \times 10^{-6}$  a.u.). Yellow and blue represent the spin density of major and minor spins, respectively.

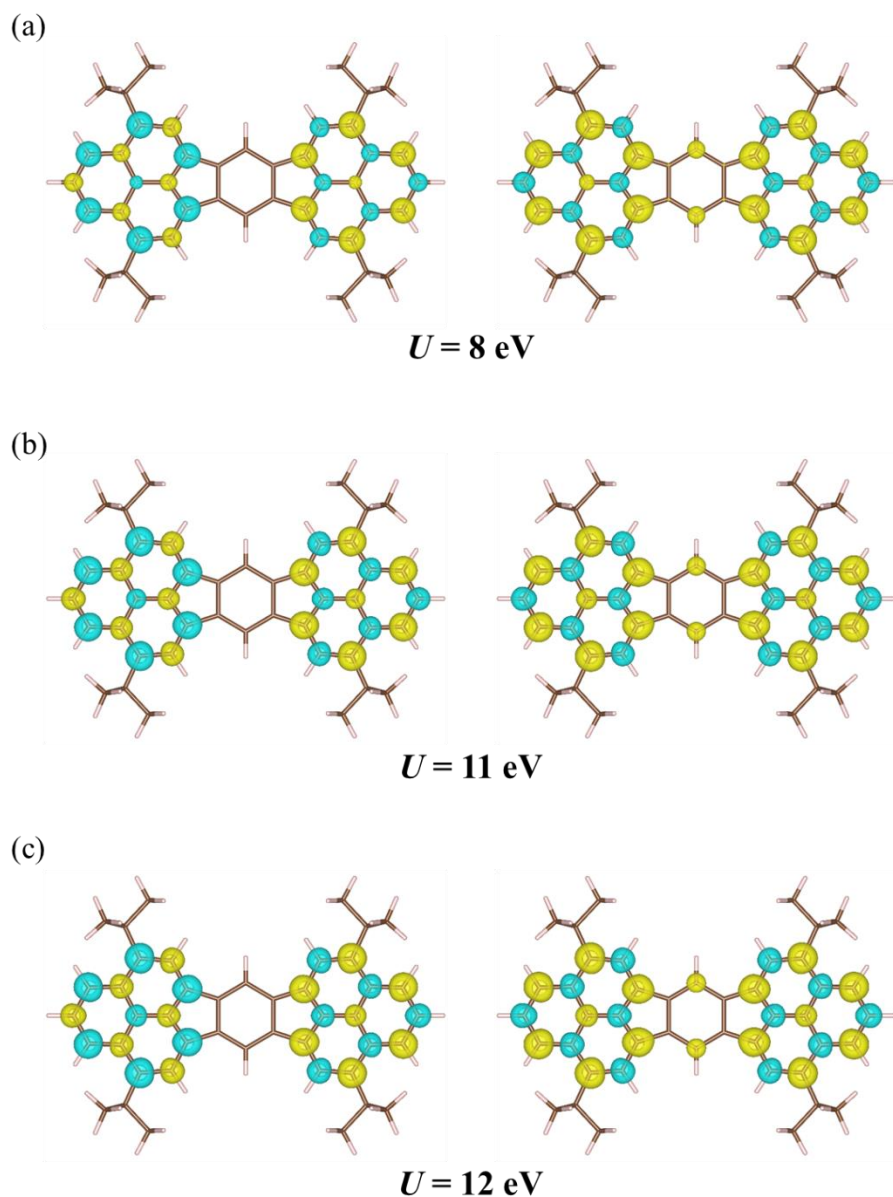

**Figure S5.** Spin density distributions of Mol 1 estimated by DFT+ $U$ /plane-wave. (a)  $U = 8 \text{ eV}$ , (b)  $U = 11 \text{ eV}$ , and (c)  $U = 12 \text{ eV}$ . Left and right panels are LS and HS states, respectively. The threshold is  $0.003 \text{ e}^-/\text{Bohr}^3$ . Yellow and blue represent the spin density of major and minor spins, respectively.

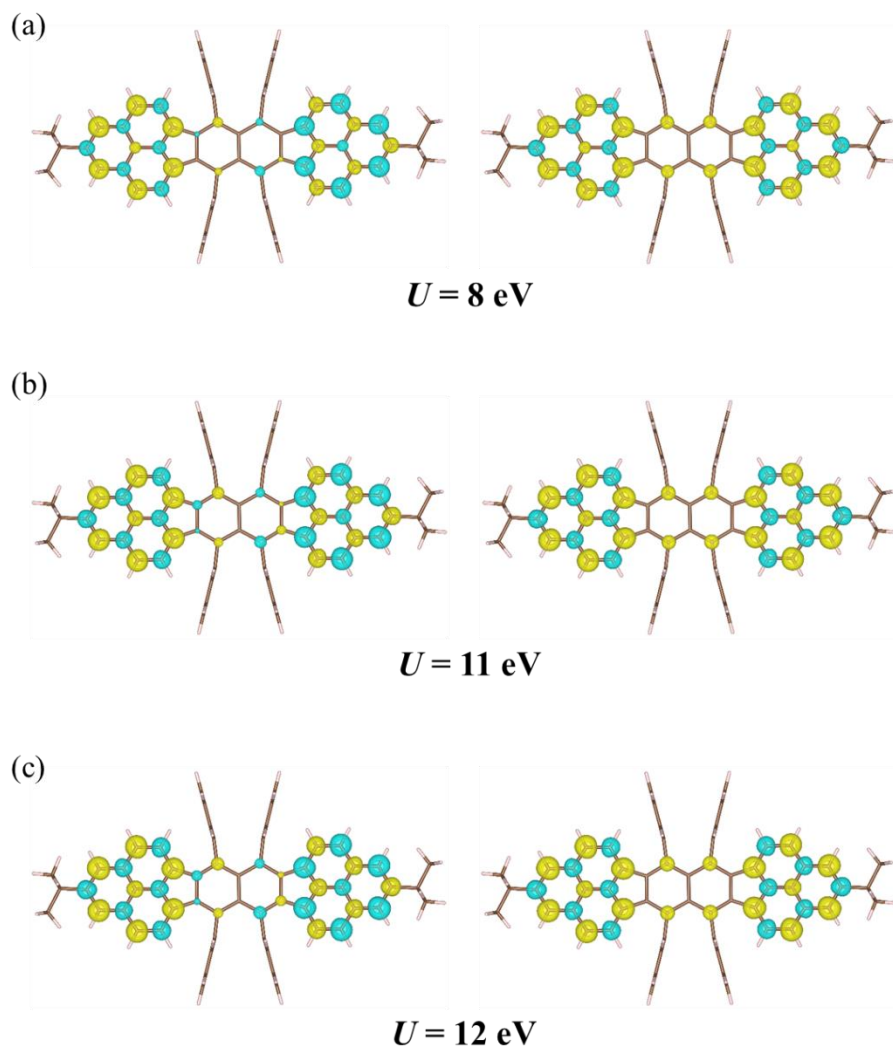

**Figure S6.** Spin density distributions of Mol 2 estimated by DFT+ $U$ /plane-wave. (a)  $U = 8 \text{ eV}$ , (b)  $U = 11 \text{ eV}$ , and (c)  $U = 12 \text{ eV}$ . Left and right panels are LS and HS states, respectively. The threshold is  $0.003 \text{ e}^-/\text{Bohr}^3$ . Yellow and blue represent the spin density of major and minor spins, respectively.

(a)

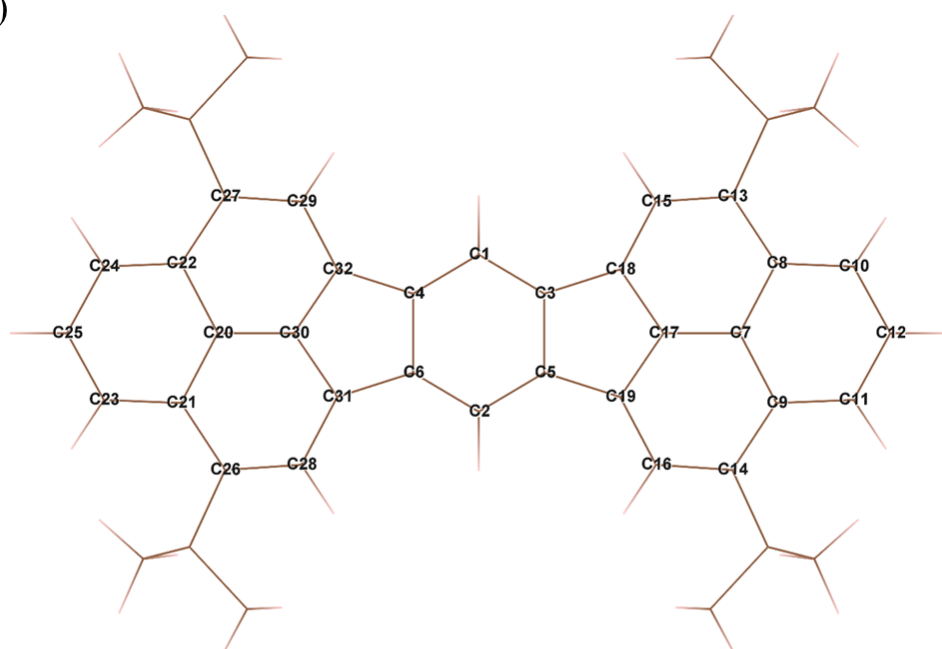

(b)

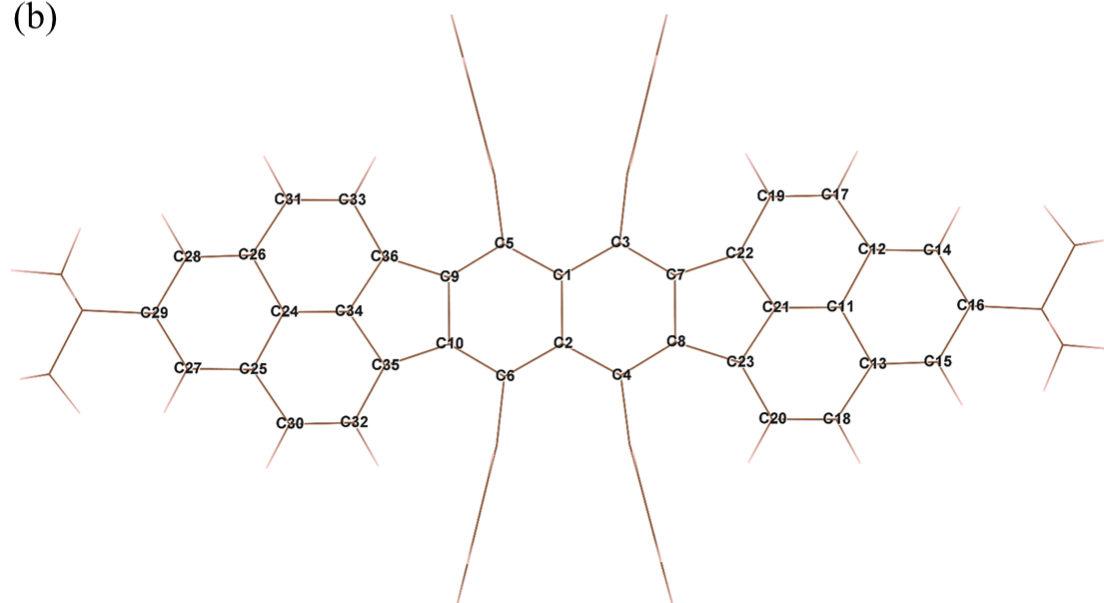

**Figure S7.** Atom index for carbon atoms in the bisphenarenyl framework.

**Table S1.** Local magnetic moments of carbon atoms in the bisphenarenyl framework of the LS state of Mol 1.

| Atom index | Group | PBE0   | $U = 8$ eV | $U = 11$ eV | $U = 12$ eV |
|------------|-------|--------|------------|-------------|-------------|
| C1         | G3    | 0.000  | 0.000      | 0.000       | 0.000       |
| C2         | G3    | 0.000  | 0.000      | 0.000       | 0.000       |
| C3         | G3    | -0.011 | -0.011     | -0.017      | -0.019      |
| C4         | G3    | 0.011  | 0.011      | 0.017       | 0.019       |
| C5         | G3    | -0.011 | -0.011     | -0.017      | -0.019      |
| C6         | G3    | 0.011  | 0.011      | 0.017       | 0.019       |
| C7         | G2    | 0.028  | 0.032      | 0.061       | 0.073       |
| C8         | G2    | -0.05  | -0.052     | -0.084      | -0.097      |
| C9         | G2    | -0.05  | -0.052     | -0.084      | -0.097      |
| C10        | G1    | 0.096  | 0.096      | 0.132       | 0.146       |
| C11        | G1    | 0.096  | 0.096      | 0.132       | 0.146       |
| C12        | G2    | -0.049 | -0.053     | -0.087      | -0.100      |
| C13        | G1    | 0.117  | 0.109      | 0.146       | 0.159       |
| C14        | G1    | 0.117  | 0.109      | 0.146       | 0.159       |
| C15        | G2    | -0.058 | -0.058     | -0.090      | -0.102      |
| C16        | G2    | -0.058 | -0.058     | -0.090      | -0.102      |
| C17        | G2    | -0.046 | -0.046     | -0.075      | -0.086      |
| C18        | G1    | 0.115  | 0.100      | 0.131       | 0.142       |
| C19        | G1    | 0.115  | 0.100      | 0.131       | 0.142       |
| C20        | G2    | -0.028 | -0.032     | -0.061      | -0.073      |
| C21        | G2    | 0.050  | 0.052      | 0.084       | 0.097       |
| C22        | G2    | 0.050  | 0.052      | 0.084       | 0.097       |
| C23        | G1    | -0.096 | -0.096     | -0.132      | -0.146      |
| C24        | G1    | -0.096 | -0.096     | -0.132      | -0.146      |
| C25        | G2    | 0.049  | 0.053      | 0.087       | 0.100       |
| C26        | G1    | -0.117 | -0.109     | -0.146      | -0.159      |
| C27        | G1    | -0.117 | -0.109     | -0.146      | -0.159      |
| C28        | G2    | 0.058  | 0.058      | 0.090       | 0.102       |
| C29        | G2    | 0.058  | 0.058      | 0.090       | 0.102       |
| C30        | G2    | 0.046  | 0.046      | 0.075       | 0.086       |
| C31        | G1    | -0.115 | -0.100     | -0.131      | -0.142      |
| C32        | G1    | -0.115 | -0.100     | -0.131      | -0.142      |



**Table S2.** Local magnetic moments of carbon atoms in the bisphenarenyl framework of the HS state of Mol 1.

| Atom index | Group | PBE0   | $U = 8$ eV | $U = 11$ eV | $U = 12$ eV |
|------------|-------|--------|------------|-------------|-------------|
| C1         | G3    | 0.036  | 0.042      | 0.046       | 0.048       |
| C2         | G3    | 0.036  | 0.042      | 0.046       | 0.048       |
| C3         | G3    | 0.010  | 0.010      | 0.008       | 0.007       |
| C4         | G3    | 0.010  | 0.010      | 0.008       | 0.007       |
| C5         | G3    | 0.010  | 0.010      | 0.008       | 0.007       |
| C6         | G3    | 0.010  | 0.010      | 0.008       | 0.007       |
| C7         | G2    | 0.032  | 0.041      | 0.066       | 0.077       |
| C8         | G2    | -0.058 | -0.066     | -0.092      | -0.103      |
| C9         | G2    | -0.058 | -0.066     | -0.092      | -0.103      |
| C10        | G1    | 0.117  | 0.128      | 0.152       | 0.162       |
| C11        | G1    | 0.117  | 0.128      | 0.152       | 0.162       |
| C12        | G2    | -0.059 | -0.071     | -0.098      | -0.109      |
| C13        | G1    | 0.138  | 0.145      | 0.168       | 0.177       |
| C14        | G1    | 0.138  | 0.145      | 0.168       | 0.177       |
| C15        | G2    | -0.060 | -0.067     | -0.092      | -0.103      |
| C16        | G2    | -0.060 | -0.067     | -0.092      | -0.103      |
| C17        | G2    | -0.054 | -0.061     | -0.084      | -0.094      |
| C18        | G1    | 0.132  | 0.134      | 0.153       | 0.161       |
| C19        | G1    | 0.132  | 0.134      | 0.153       | 0.161       |
| C20        | G2    | 0.032  | 0.041      | 0.066       | 0.077       |
| C21        | G2    | -0.058 | -0.066     | -0.092      | -0.103      |
| C22        | G2    | -0.058 | -0.066     | -0.092      | -0.103      |
| C23        | G1    | 0.117  | 0.128      | 0.152       | 0.162       |
| C24        | G1    | 0.117  | 0.128      | 0.152       | 0.162       |
| C25        | G2    | -0.059 | -0.071     | -0.098      | -0.109      |
| C26        | G1    | 0.138  | 0.145      | 0.168       | 0.177       |
| C27        | G1    | 0.138  | 0.145      | 0.168       | 0.177       |
| C28        | G2    | -0.060 | -0.067     | -0.092      | -0.103      |
| C29        | G2    | -0.060 | -0.067     | -0.092      | -0.103      |
| C30        | G2    | -0.054 | -0.061     | -0.084      | -0.094      |
| C31        | G1    | 0.132  | 0.134      | 0.153       | 0.161       |
| C32        | G1    | 0.132  | 0.134      | 0.153       | 0.161       |

**Table S3.** Local magnetic moments of carbon atoms in the bisphenarenyl framework of the LS state of Mol 2.

| atom index | group | PBE0   | $U = 8$ eV | $U = 11$ eV | $U = 12$ eV |
|------------|-------|--------|------------|-------------|-------------|
| C1         | G3    | -0.003 | -0.003     | -0.005      | -0.005      |
| C2         | G3    | 0.003  | 0.003      | 0.005       | 0.005       |
| C3         | G2    | -0.023 | -0.023     | -0.027      | -0.029      |
| C4         | G2    | -0.031 | -0.030     | -0.038      | -0.042      |
| C5         | G2    | 0.031  | 0.03       | 0.038       | 0.042       |
| C6         | G2    | 0.023  | 0.023      | 0.027       | 0.029       |
| C7         | G3    | 0.015  | 0.016      | 0.023       | 0.025       |
| C8         | G3    | 0.021  | 0.023      | 0.032       | 0.036       |
| C9         | G3    | -0.021 | -0.023     | -0.032      | -0.036      |
| C10        | G3    | -0.015 | -0.016     | -0.023      | -0.025      |
| C11        | G2    | -0.031 | -0.039     | -0.067      | -0.079      |
| C12        | G2    | 0.053  | 0.057      | 0.086       | 0.098       |
| C13        | G2    | 0.055  | 0.059      | 0.088       | 0.100       |
| C14        | G1    | -0.112 | -0.116     | -0.148      | -0.159      |
| C15        | G1    | -0.125 | -0.129     | -0.163      | -0.175      |
| C16        | G2    | 0.060  | 0.068      | 0.101       | 0.114       |
| C17        | G1    | -0.117 | -0.116     | -0.146      | -0.157      |
| C18        | G1    | -0.124 | -0.122     | -0.153      | -0.164      |
| C19        | G2    | 0.062  | 0.065      | 0.095       | 0.107       |
| C20        | G2    | 0.065  | 0.069      | 0.099       | 0.111       |
| C21        | G2    | 0.050  | 0.053      | 0.080       | 0.091       |
| C22        | G1    | -0.119 | -0.110     | -0.136      | -0.145      |
| C23        | G1    | -0.127 | -0.117     | -0.144      | -0.153      |
| C24        | G2    | 0.031  | 0.039      | 0.067       | 0.079       |
| C25        | G2    | -0.053 | -0.057     | -0.086      | -0.098      |
| C26        | G2    | -0.055 | -0.059     | -0.088      | -0.100      |
| C27        | G1    | 0.112  | 0.116      | 0.148       | 0.159       |
| C28        | G1    | 0.125  | 0.129      | 0.163       | 0.175       |
| C29        | G2    | -0.060 | -0.068     | -0.101      | -0.114      |
| C30        | G1    | 0.117  | 0.116      | 0.146       | 0.157       |
| C31        | G1    | 0.124  | 0.122      | 0.153       | 0.164       |
| C32        | G2    | -0.062 | -0.065     | -0.095      | -0.107      |
| C33        | G2    | -0.065 | -0.069     | -0.099      | -0.111      |
| C34        | G2    | -0.050 | -0.053     | -0.080      | -0.091      |

|     |    |       |       |       |       |
|-----|----|-------|-------|-------|-------|
| C35 | G1 | 0.119 | 0.110 | 0.136 | 0.145 |
| C36 | G1 | 0.127 | 0.117 | 0.144 | 0.153 |

**Table S4.** Local magnetic moments of carbon atoms in the bisphenarenyl framework of the HS state of Mol 2.

| Atom index | group | PBE0   | $U = 8$ eV | $U = 11$ eV | $U = 12$ eV |
|------------|-------|--------|------------|-------------|-------------|
| C1         | G3    | 0.009  | 0.008      | 0.007       | 0.006       |
| C2         | G3    | 0.009  | 0.008      | 0.007       | 0.006       |
| C3         | G2    | 0.035  | 0.042      | 0.047       | 0.049       |
| C4         | G2    | 0.038  | 0.045      | 0.050       | 0.053       |
| C5         | G2    | 0.038  | 0.045      | 0.050       | 0.053       |
| C6         | G2    | 0.035  | 0.042      | 0.047       | 0.049       |
| C7         | G3    | -0.006 | -0.007     | -0.012      | -0.014      |
| C8         | G3    | -0.008 | -0.009     | -0.014      | -0.016      |
| C9         | G3    | -0.008 | -0.009     | -0.014      | -0.016      |
| C10        | G3    | -0.006 | -0.007     | -0.012      | -0.014      |
| C11        | G2    | 0.033  | 0.043      | 0.069       | 0.081       |
| C12        | G2    | -0.057 | -0.064     | -0.090      | -0.101      |
| C13        | G2    | -0.059 | -0.066     | -0.092      | -0.103      |
| C14        | G1    | 0.122  | 0.133      | 0.158       | 0.168       |
| C15        | G1    | 0.136  | 0.148      | 0.175       | 0.185       |
| C16        | G2    | -0.065 | -0.078     | -0.107      | -0.119      |
| C17        | G1    | 0.126  | 0.133      | 0.157       | 0.166       |
| C18        | G1    | 0.133  | 0.140      | 0.163       | 0.173       |
| C19        | G2    | -0.062 | -0.069     | -0.097      | -0.108      |
| C20        | G2    | -0.065 | -0.073     | -0.100      | -0.111      |
| C21        | G2    | -0.054 | -0.061     | -0.085      | -0.095      |
| C22        | G1    | 0.126  | 0.127      | 0.147       | 0.155       |
| C23        | G1    | 0.134  | 0.135      | 0.155       | 0.162       |
| C24        | G2    | 0.033  | 0.043      | 0.069       | 0.081       |
| C25        | G2    | -0.057 | -0.064     | -0.090      | -0.101      |
| C26        | G2    | -0.059 | -0.066     | -0.092      | -0.103      |
| C27        | G1    | 0.122  | 0.133      | 0.158       | 0.168       |
| C28        | G1    | 0.136  | 0.148      | 0.175       | 0.185       |
| C29        | G2    | -0.065 | -0.078     | -0.107      | -0.119      |
| C30        | G1    | 0.126  | 0.133      | 0.157       | 0.166       |
| C31        | G1    | 0.133  | 0.140      | 0.163       | 0.173       |
| C32        | G2    | -0.062 | -0.069     | -0.097      | -0.108      |
| C33        | G2    | -0.065 | -0.073     | -0.100      | -0.111      |
| C34        | G2    | -0.054 | -0.061     | -0.085      | -0.095      |

|     |    |       |       |       |       |
|-----|----|-------|-------|-------|-------|
| C35 | G1 | 0.126 | 0.127 | 0.147 | 0.155 |
| C36 | G1 | 0.134 | 0.135 | 0.155 | 0.162 |

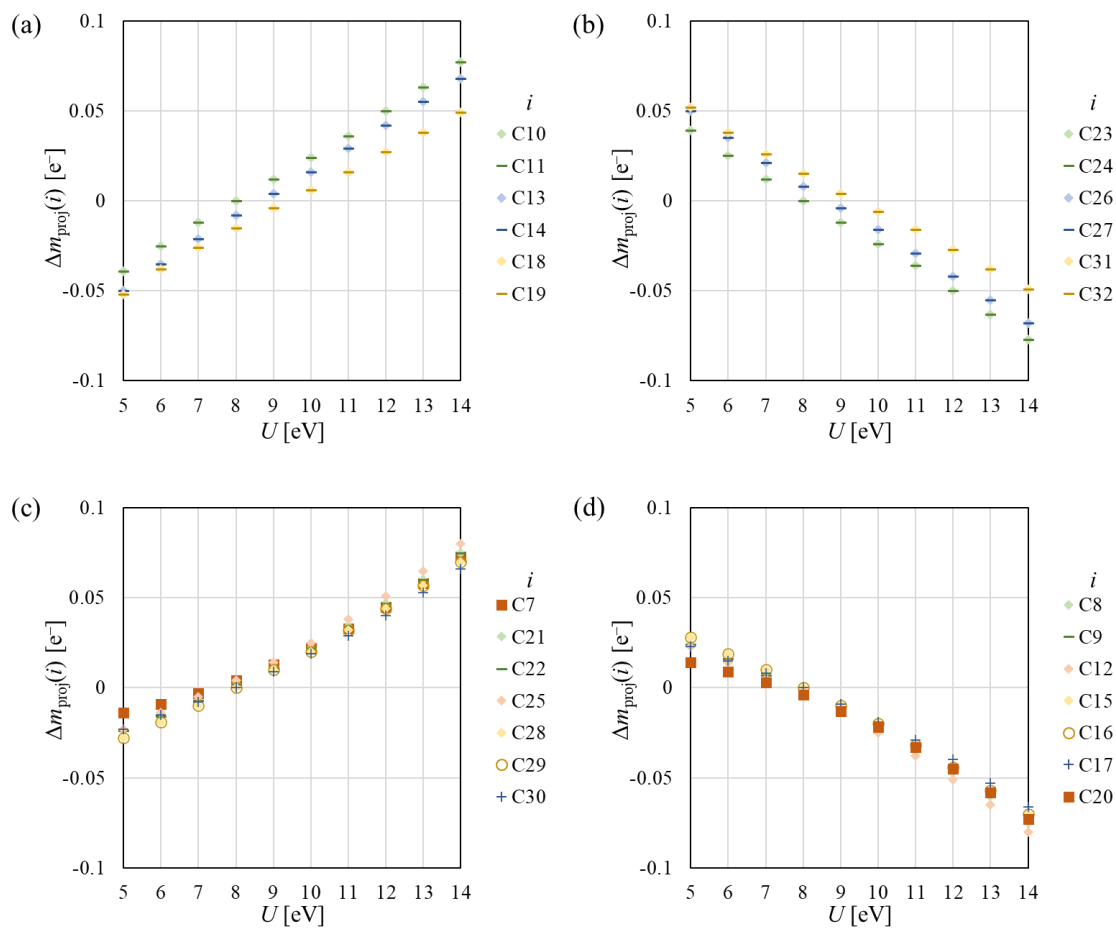

**Figure S8.** Local magnetic moment dependences on the  $U$  values of Mol 1 with LS state. (a) carbon atoms of G1 with up spin (C10, C11, C13, C14, C18, and C19 atoms), (b) carbon atoms of G1 with down spin (C23, C24, C26, C27, C31, and C32 atoms), (c) carbon atoms of G2 with up spin (C7, C21, C22, C25, C28, C29, and C30 atoms), and (d) carbon atoms of G2 with down spin (C8, C9, C12, C15, C16, C17, and C20 atoms).

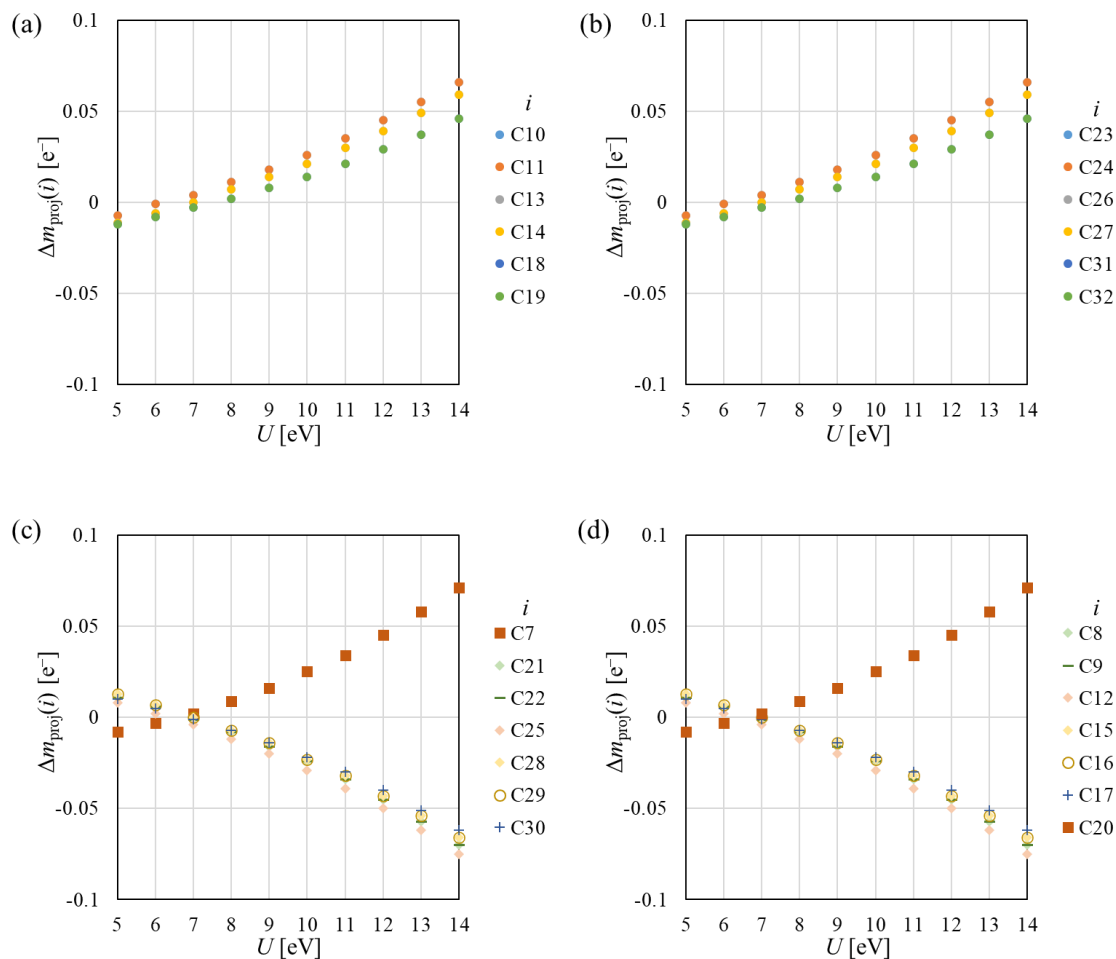

**Figure S9.** Local magnetic moment dependences on the  $U$  values of Mol 1 with HS state. (a) carbon atoms of G1 (C10, C11, C13, C14, C18, and C19 atoms) which have up spin when it is in LS state, (b) carbon atoms of G1 (C23, C24, C26, C27, C31, and C32 atoms) which have down spin when it is in LS state, (c) carbon atoms of G2 (C7, C21, C22, C25, C28, C29, and C30 atoms) which have up spin when it is in LS state, and (d) carbon atoms of G2 (C8, C9, C12, C15, C16, C17, and C20 atoms) which have down spin when it is in LS state.

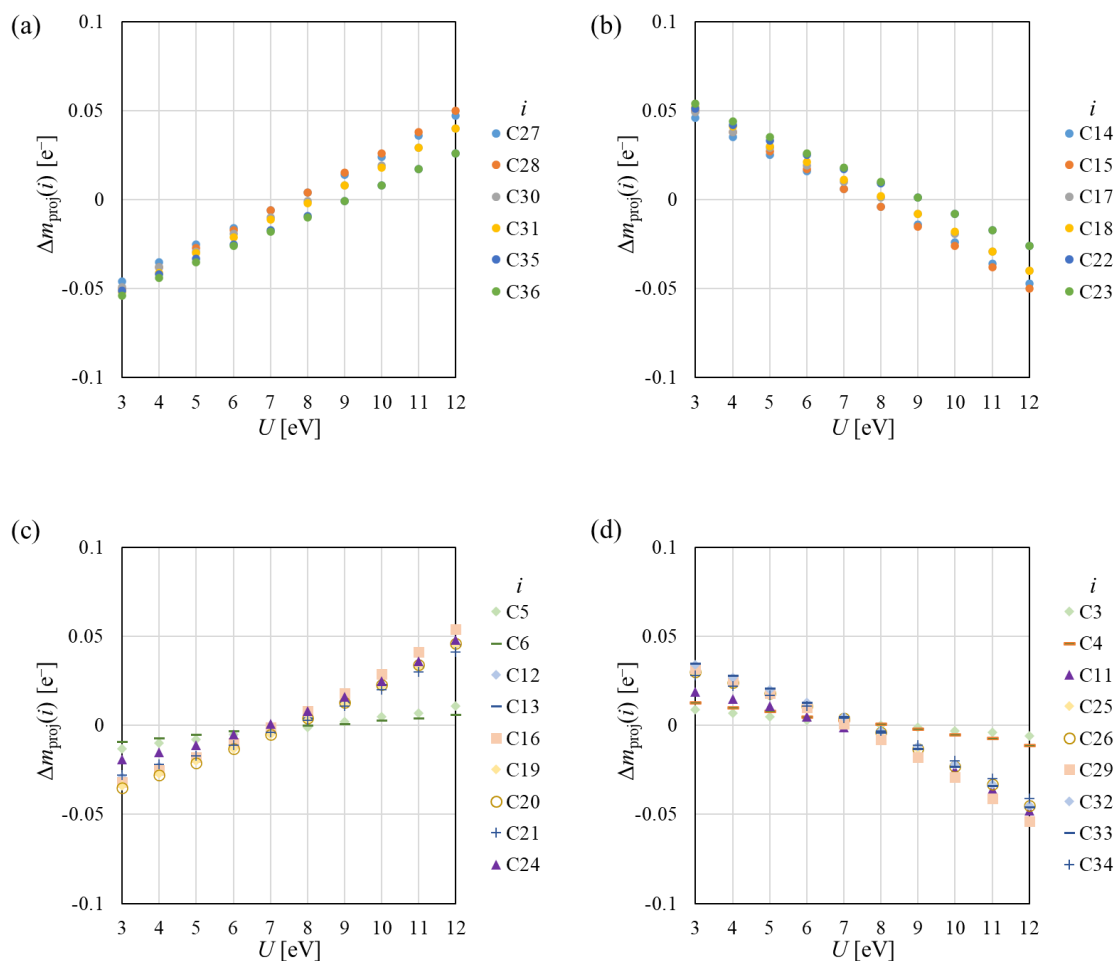

**Figure S10.** Local magnetic moment dependences on the  $U$  values of Mol 2 with LS state. (a) carbon atoms of G1 with up spin (C27, C28, C30, C31, C35, and C36 atoms), (b) carbon atoms of G1 with down spin (C14, C15, C17, C18, C22, and C23 atoms), (c) carbon atoms of G2 with up spin (C5, C6, C12, C13, C16, C19, C20, C21, and C24 atoms), and (d) carbon atoms of G2 with down spin (C3, C4, C11, C25, C26, C29, C32, C33, and C34 atoms).



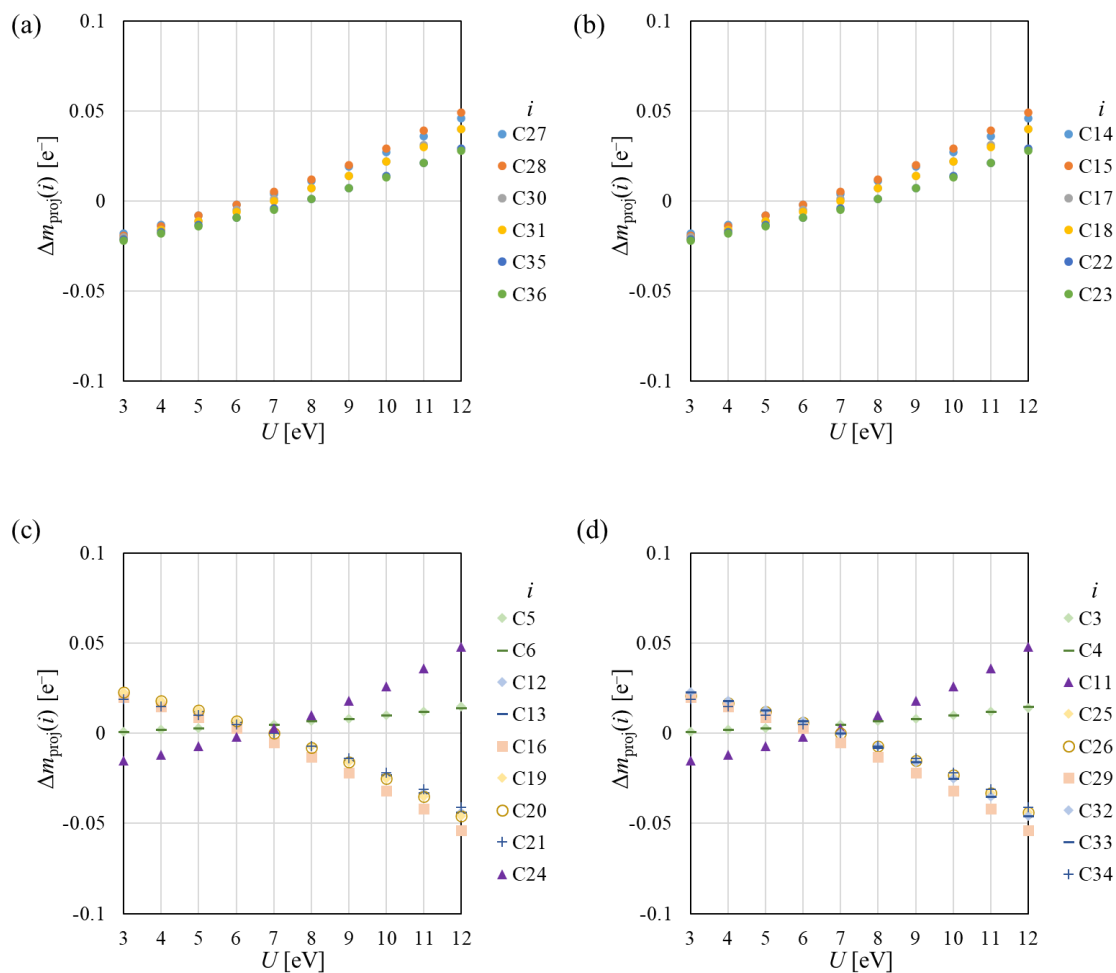

**Figure S11.** Local magnetic moment dependences on the  $U$  values of Mol 2 with HS state. (a) carbon atoms of G1 (C27, C28, C30, C31, C35, and C36 atoms) which have up spin when it is in LS state, (b) carbon atoms of G1 (C14, C15, C17, C18, C22, and C23 atoms) which have down spin when it is in LS state, (c) carbon atoms of G2 (C5, C6, C12, C13, C16, C19, C20, C21, and C24 atoms) which have up spin when it is in LS state, and (d) carbon atoms of G2 (C3, C4, C11, C25, C26, C29, C32, C33, and C34 atoms) which have down spin when it is in LS state.
